# Supplementary figures and images for: A distinct p53 target gene set predicts for response to the selective p53–HDM2 inhibitor NVP-CGM097
Source: eLife journal article supplement (doi:10.7554/elife.06498), 2015-05-12

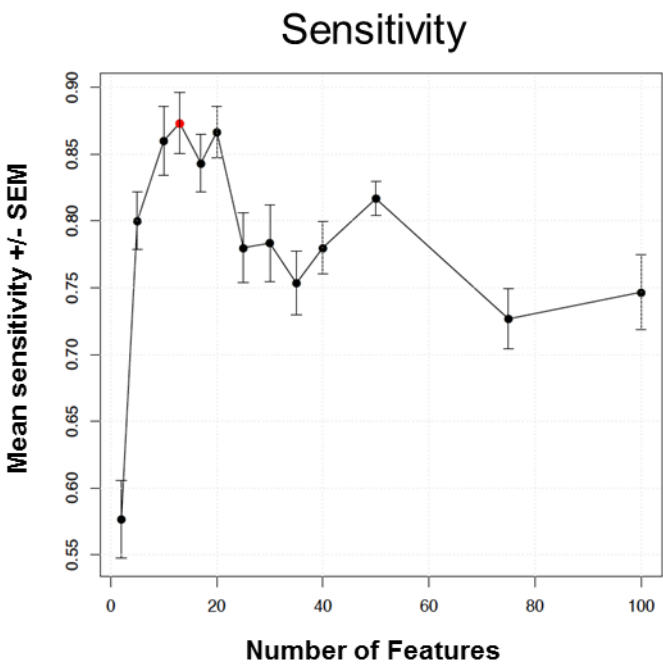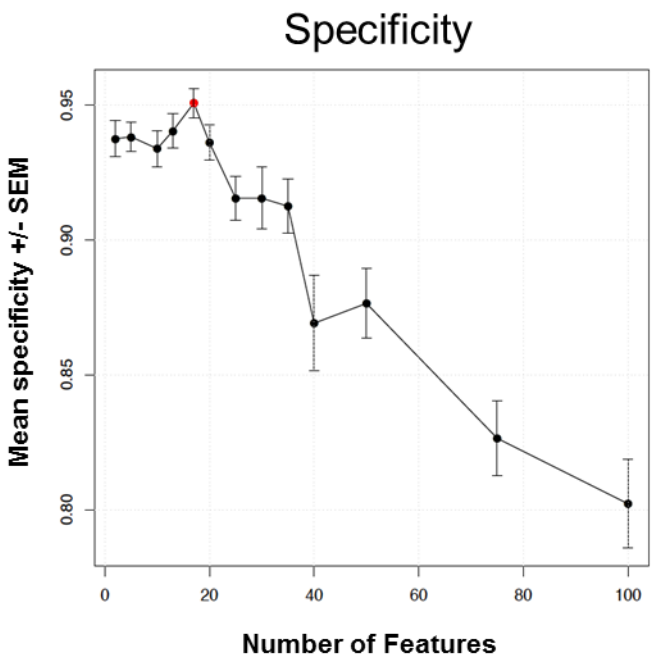

Supplement: supp [file elife-06498-supp-v1.zip]
